# Supplementary material for: Exploring malaria vector diversity on the Amazon Frontier
Source: Malar J. 2018 Sep 27;17:342. doi: 10.1186/s12936-018-2483-2 (PMC6161421; doi:10.1186/s12936-018-2483-2)
Supplement: Supplementary file 1 — Additional file 1. Sample information of collection specimens and reference sequences. [file 12936_2018_2483_MOESM1_ESM.xlsx]

## Sheet: Sheet1
Morpho ID	Species ID	Field specimen ID	GenBank Accession No.	Country	State	Municipality	Longitude	Latitude	Additional Info.
An. fluminensis	An_fluminensis ss	AC432_1	MH844249	Brazil	Acre	Acrelândia	-66.8641	-9.95144	-
An. fluminensis	An_fluminensis ss	AC44_35	MH844257	Brazil	Acre	Acrelândia	-66.8169	-10.0114	-
An. fluminensis	An_fluminensis ss	AC44_37	MH844259	Brazil	Acre	Acrelândia	-66.8169	-10.0114	-
An. fluminensis	An_fluminensis ss	AC47_19	MH844280	Brazil	Acre	Acrelândia	-66.8169	-10.0114	-
An. fluminensis	An_fluminensis ss	AC48_26	MH844285	Brazil	Acre	Acrelândia	-66.8169	-10.0114	-
An. fluminensis	An_fluminensis ss	AC49_27	MH844292	Brazil	Acre	Acrelândia	-66.8169	-10.0114	-
An. costai	An_nearcostaiG1	AC107_2	MH844127	Brazil	Acre	Acrelândia	-66.7905	-10.0033	-
An. costai	An_nearcostaiG1	AC111_1	MH844131	Brazil	Acre	Acrelândia	-66.7905	-10.0033	-
An. costai	An_nearcostaiG1	AC202_7	MH844146	Brazil	Acre	Cruzeiro do Sul	-60.8169	-7.60089	-
An. costai	An_nearcostaiG1	AC202_8	MH844147	Brazil	Acre	Cruzeiro do Sul	-60.8169	-7.60089	-
An. costai	An_nearcostaiG1	AC204_1	MH844148	Brazil	Acre	Cruzeiro do Sul	-72.8169	-7.60089	-
An. costai	An_nearcostaiG1	AC214_10	MH844151	Brazil	Acre	Cruzeiro do Sul	-60.82	-7.59583	-
An. costai	An_nearcostaiG1	AC214_11	MH844152	Brazil	Acre	Cruzeiro do Sul	-60.82	-7.59583	-
An. costai	An_nearcostaiG1	AC267_3	MH844177	Brazil	Acre	Mâncio Lima	-72.883	-7.618	-
An. costai	An_nearcostaiG1	AC268_1	MH844178	Brazil	Acre	Mâncio Lima	-72.883	-7.618	-
An. costai	An_nearcostaiG1	AC278_1	MH844180	Brazil	Acre	Mâncio Lima	-72.9858	-7.60064	-
An. costai	An_nearcostaiG1	AC280_2	MH844181	Brazil	Acre	Mâncio Lima	-72.9865	-7.60321	-
An. costai	An_nearcostaiG1	AC281_1	MH844182	Brazil	Acre	Mâncio Lima	-72.9865	-7.60321	-
An. costai	An_nearcostaiG1	AC291_2	MH844184	Brazil	Acre	Cruzeiro do Sul	-72.7357	-7.55089	-
An. costai	An_nearcostaiG1	AC292_1	MH844185	Brazil	Acre	Cruzeiro do Sul	-72.7357	-7.55089	-
An. costai	An_nearcostaiG1	AC314_4	MH844190	Brazil	Acre	Mâncio Lima	-72.87	-7.6232	-
An. costai	An_nearcostaiG1	AC314_5	MH844191	Brazil	Acre	Mâncio Lima	-72.87	-7.6232	-
An. costai	An_nearcostaiG1	AC314_6	MH844192	Brazil	Acre	Mâncio Lima	-72.87	-7.6232	-
An. costai	An_nearcostaiG1	AC316_7	MH844196	Brazil	Acre	Mâncio Lima	-72.87	-7.6232	-
An. costai	An_nearcostaiG1	AC371_3	MH844203	Brazil	Acre	Mâncio Lima	-72.9911	-7.4416	-
An. costai	An_nearcostaiG1	AC43_94	MH844253	Brazil	Acre	Acrelândia	-66.8169	-10.0114	-
An. costai	An_nearcostaiG1	AC48_24	MH844284	Brazil	Acre	Acrelândia	-66.8169	-10.0114	-
An. costai	An_nearcostaiG1	AC97_1	MH844324	Brazil	Acre	Acrelândia	-66.8401	-9.99657	-
An. costai	An_nearcostaiG1	AM126_56	MH844115	Brazil	Amazonas	Itacoatiara	-59.1402	-3.04993	-
An. costai	An_nearcostaiG1	AM32_2	MH844338	Brazil	Amazonas	Lábrea	-64.6631	-7.38205	-
An. costai	An_nearcostaiG2	AC214_12	MH844153	Brazil	Acre	Cruzeiro do Sul	-60.82	-7.59583	-
An. costai	An_nearcostaiG2	AC214_13	MH844154	Brazil	Acre	Cruzeiro do Sul	-60.82	-7.59583	-
An. costai	An_nearcostaiG2	AC214_9	MH844160	Brazil	Acre	Cruzeiro do Sul	-60.82	-7.59583	-
An. costai	An_nearcostaiG2	AC291_1	MH844183	Brazil	Acre	Cruzeiro do Sul	-72.7357	-7.55089	-
An. costai	An_nearcostaiG2	AC321_5	MH844197	Brazil	Acre	Mâncio Lima	-72.87	-7.6232	-
An. costai	An_nearcostaiG3	AC105_1	MH844119	Brazil	Acre	Acrelândia	-66.7905	-10.0033	-
An. costai	An_nearcostaiG3	AC106_1	MH844122	Brazil	Acre	Acrelândia	-66.7905	-10.0033	-
An. costai	An_nearcostaiG3	AC108_1	MH844129	Brazil	Acre	Acrelândia	-66.7905	-10.0033	-
An. costai	An_nearcostaiG3	AC109_2	MH844130	Brazil	Acre	Acrelândia	-66.7905	-10.0033	-
An. costai	An_nearcostaiG3	AC396_1	MH844222	Brazil	Acre	Acrelândia	-66.791	-10.0031	-
An. costai	An_nearcostaiG3	AC47_15	MH844276	Brazil	Acre	Acrelândia	-66.8169	-10.0114	-
An. costai	An_nearcostaiG3	AM27_1	MH844336	Brazil	Amazonas	Lábrea	-64.675	-7.40615	-
An. costai	An_nearcostaiG3	RO166_3	MH844362	Brazil	Rondônia	Machadinho D'Oeste	-62.2297	-9.19221	-
An. costai	An_nearcostaiG3	RO167_1	MH844363	Brazil	Rondônia	Machadinho D'Oeste	-62.2297	-9.19221	-
An. costai	An_nearcostaiG3	RO168_3	MH844364	Brazil	Rondônia	Machadinho D'Oeste	-62.2297	-9.19221	-
An. costai	An_nearcostaiG3	RO183_11	MH844367	Brazil	Rondônia	Machadinho D'Oeste	-62.2552	-9.22324	-
An. costai	An_nearcostaiG3	RO216_23	MH844370	Brazil	Rondônia	Machadinho D'Oeste	-62.2791	-9.25755	-
An. costai	An_nearcostaiG3	RO218_35	MH844371	Brazil	Rondônia	Machadinho D'Oeste	-62.2791	-9.25755	-
An. costai	An_nearcostaiG3	RO219_12	MH844372	Brazil	Rondônia	Machadinho D'Oeste	-62.2791	-9.25755	-
An. costai	An_nearcostaiG3	RO222_21	MH844374	Brazil	Rondônia	Machadinho D'Oeste	-62.2512	-9.24916	-
An. costai	An_nearcostaiG3	RO222_22	MH844375	Brazil	Rondônia	Machadinho D'Oeste	-62.2512	-9.24916	-
An. costai	An_nearcostaiG3	RO223_34	MH844376	Brazil	Rondônia	Machadinho D'Oeste	-62.2512	-9.24916	-
An. costai	An_nearcostaiG3	RO223_35	MH844377	Brazil	Rondônia	Machadinho D'Oeste	-62.2512	-9.24916	-
An. costai	An_nearcostaiG3	RO223_36	MH844378	Brazil	Rondônia	Machadinho D'Oeste	-62.2512	-9.24916	-
An. costai	An_nearcostaiG4	AC201_1	MH844143	Brazil	Acre	Cruzeiro do Sul	-72.8169	-7.60089	-
An. costai	An_nearcostaiG4	AC201_2	MH844144	Brazil	Acre	Cruzeiro do Sul	-72.8169	-7.60089	-
An. costai	An_nearcostaiG4	AC201_3	MH844145	Brazil	Acre	Cruzeiro do Sul	-72.8169	-7.60089	-
An. costai	An_nearcostaiG4	AC206_6	MH844150	Brazil	Acre	Cruzeiro do Sul	-72.8169	-7.60089	-
An. costai	An_nearcostaiG4	AC214_8	MH844159	Brazil	Acre	Cruzeiro do Sul	-60.82	-7.59583	-
An. costai	An_nearcostaiG4	AM27_2	MH844337	Brazil	Amazonas	Lábrea	-64.675	-7.40615	-
An. costai	An_nearcostaiG5	AC107_3	MH844128	Brazil	Acre	Acrelândia	-66.7905	-10.0033	-
An. fluminensis	An_nearfluminensisG1	AC44_34	MH844256	Brazil	Acre	Acrelândia	-66.8169	-10.0114	-
An. fluminensis	An_nearfluminensisG1	AC44_36	MH844258	Brazil	Acre	Acrelândia	-66.8169	-10.0114	-
An. fluminensis	An_nearfluminensisG1	AC45_54	MH844270	Brazil	Acre	Acrelândia	-66.8169	-10.0114	-
An. fluminensis	An_nearfluminensisG1	AC47_16	MH844277	Brazil	Acre	Acrelândia	-66.8169	-10.0114	-
An. fluminensis	An_nearfluminensisG1	AC49_24	MH844289	Brazil	Acre	Acrelândia	-66.8169	-10.0114	-
An. fluminensis	An_nearfluminensisG1	AC49_25	MH844290	Brazil	Acre	Acrelândia	-66.8169	-10.0114	-
An. fluminensis	An_nearfluminensisG1	AC49_26	MH844291	Brazil	Acre	Acrelândia	-66.8169	-10.0114	-
An. fluminensis	An_nearfluminensisG1	AC50_22	MH844294	Brazil	Acre	Acrelândia	-66.8169	-10.0114	-
An. fluminensis	An_nearfluminensisG1	AC51_7	MH844297	Brazil	Acre	Acrelândia	-66.8169	-10.0114	-
An. fluminensis	An_nearfluminensisG1	AC53_39	MH844300	Brazil	Acre	Acrelândia	-66.8169	-10.0114	-
An. fluminensis	An_nearfluminensisG1	AC53_40	MH844301	Brazil	Acre	Acrelândia	-66.8169	-10.0114	-
An. fluminensis	An_nearfluminensisG1	AC53_41	MH844302	Brazil	Acre	Acrelândia	-66.8169	-10.0114	-
An. fluminensis	An_nearfluminensisG1	AC53_42	MH844303	Brazil	Acre	Acrelândia	-66.8169	-10.0114	-
An. fluminensis	An_nearfluminensisG1	AC53_43	MH844304	Brazil	Acre	Acrelândia	-66.8169	-10.0114	-
An. fluminensis	An_nearfluminensisG1	AC53_44	MH844305	Brazil	Acre	Acrelândia	-66.8169	-10.0114	-
An. fluminensis	An_nearfluminensisG1	AC53_45	MH844306	Brazil	Acre	Acrelândia	-66.8169	-10.0114	-
An. fluminensis	An_nearfluminensisG1	AC53_46	MH844307	Brazil	Acre	Acrelândia	-66.8169	-10.0114	-
An. fluminensis	An_nearfluminensisG1	AC53_47	MH844308	Brazil	Acre	Acrelândia	-66.8169	-10.0114	-
An. fluminensis	An_nearfluminensisG1	AC53_48	MH844309	Brazil	Acre	Acrelândia	-66.8169	-10.0114	-
An. fluminensis	An_nearfluminensisG1	AC53_49	MH844310	Brazil	Acre	Acrelândia	-66.8169	-10.0114	-
An. fluminensis	An_nearfluminensisG1	AC96_1	MH844323	Brazil	Acre	Acrelândia	-66.8401	-9.99657	-
An. malefactor	An_nearmalefactor	AC47_17	MH844278	Brazil	Acre	Acrelândia	-66.8169	-10.0114	-
An. punctimacula	An_nearpunctimacula	AC226_4	MH844166	Brazil	Acre	Cruzeiro do Sul	-72.82	-7.59583	-
An. peryassui	An_peryassui	AC357_27	MH844200	Brazil	Acre	Mâncio Lima	-72.987	-7.436	-
An. peryassui	An_peryassui	RO38_2	MH844118	Brazil	Rondônia	Monte Negro	-62.0754	-8.92911	-
An. puntimacula	An_punctimacula	AC214_17	MH844158	Brazil	Acre	Cruzeiro do Sul	-60.82	-7.59583	-
An. puntimacula	An_punctimacula	AC217_6	MH844161	Brazil	Acre	Cruzeiro do Sul	-72.82	-7.59564	-
An. puntimacula	An_punctimacula	AC224_5	MH844162	Brazil	Acre	Cruzeiro do Sul	-72.82	-7.59564	-
An. puntimacula	An_punctimacula	AC227_5	MH844167	Brazil	Acre	Cruzeiro do Sul	-72.82	-7.59583	-
An. puntimacula	An_punctimacula	AC227_6	MH844168	Brazil	Acre	Cruzeiro do Sul	-72.82	-7.59583	-
An. puntimacula	An_punctimacula	AC227_7	MH844169	Brazil	Acre	Cruzeiro do Sul	-72.82	-7.59583	-
Ny. albitarsis	Ny_albitarsisH	AC246_75	MH844172	Brazil	Acre	Mâncio Lima	-72.8856	-7.62012	-
Ny. albitarsis	Ny_albitarsisH	AC246_78	MH844113	Brazil	Acre	Mâncio Lima	-72.8856	-7.62012	-
Ny. albitarsis	Ny_albitarsisH	AM134_4	MH844330	Brazil	Amazonas	Humaitá	-63.1	-6.98069	-
Ny. arthuri	Ny_arthuriC	RO165_50	MH844360	Brazil	Rondônia	Machadinho D'Oeste	-62.2297	-9.19221	-
Ny. benarrochi	Ny_benarrochi G1	AC427_5	MH844239	Brazil	Acre	Acrelândia	-67.1435	-9.70183	-
Ny. benarrochi	Ny_benarrochi G1	AC427_6	MH844240	Brazil	Acre	Acrelândia	-67.1435	-9.70183	-
Ny. benarrochi	Ny_benarrochi G1	AC427_7	MH844241	Brazil	Acre	Acrelândia	-67.1435	-9.70183	-
Ny. benarrochi	Ny_benarrochi G2	RO181_64	MH844365	Brazil	Rondônia	Machadinho D'Oeste	-62.2552	-9.22324	-
Ny. benarrochi	Ny_benarrochi G2	RO196_43	MH844369	Brazil	Rondônia	Machadinho D'Oeste	-62.2865	-9.25393	-
Ny. benarrochi	Ny_benarrochi G2	RO222_20	MH844373	Brazil	Rondônia	Machadinho D'Oeste	-62.2512	-9.24916	-
Ny. benarrochi	Ny_benarrochiB	AC214_15	MH844156	Brazil	Acre	Cruzeiro do Sul	-60.82	-7.59583	-
Ny. benarrochi	Ny_benarrochiB	AC232_3	MH844170	Brazil	Acre	Cruzeiro do Sul	-60.8202	-7.59589	-
Ny. benarrochi	Ny_benarrochiB	AC235_3	MH844171	Brazil	Acre	Cruzeiro do Sul	-72.82	-7.59583	-
Ny. benarrochi	Ny_benarrochiB	AC246_76	MH844173	Brazil	Acre	Mâncio Lima	-72.8856	-7.62012	-
Ny. benarrochi	Ny_benarrochiB	AC246_77	MH844112	Brazil	Acre	Mâncio Lima	-72.8856	-7.62012	-
Ny. braziliensis	Ny_braziliensis	AC426_1	MH844235	Brazil	Acre	Acrelândia	-67.1435	-9.70183	-
Ny. braziliensis	Ny_braziliensis	AC427_4	MH844238	Brazil	Acre	Acrelândia	-67.1435	-9.70183	-
Ny. braziliensis	Ny_braziliensis	AC429_15	MH844244	Brazil	Acre	Acrelândia	-67.1435	-9.70183	-
Ny. braziliensis	Ny_braziliensis	AM109_2	MH844326	Brazil	Amazonas	Itacoatiara	-59.0731	-3.09364	-
Ny. braziliensis	Ny_braziliensis	AM109_3	MH844327	Brazil	Amazonas	Itacoatiara	-59.0731	-3.09364	-
Ny. braziliensis	Ny_braziliensis	AM109_4	MH844328	Brazil	Amazonas	Itacoatiara	-59.0731	-3.09364	-
Ny. braziliensis	Ny_braziliensis	AM109_5	MH844114	Brazil	Amazonas	Itacoatiara	-59.0731	-3.09364	-
Ny. braziliensis	Ny_braziliensis	AM85_6	MH844357	Brazil	Amazonas	Lábrea	-64.7409	-7.34761	-
Ny. darlingi	Ny_darlingi	AC152_4	MH844142	Brazil	Acre	Cruzeiro do Sul	-72.6897	-7.63144	-
Ny. darlingi	Ny_darlingi	AC305_36	MH844188	Brazil	Acre	Mâncio Lima	-72.8703	-7.62589	-
Ny. darlingi	Ny_darlingi	AC436_5	MH844251	Brazil	Acre	Acrelândia	-67.1115	-9.77631	-
Ny. darlingi	Ny_darlingi	AM112_1	MH844329	Brazil	Amazonas	Itacoatiara	-59.0731	-3.09364	-
Ny. darlingi	Ny_darlingi	AM21_25	MH844333	Brazil	Amazonas	Lábrea	-64.6768	-7.40467	-
Ny. darlingi	Ny_darlingi	AM21_26	MH844334	Brazil	Amazonas	Lábrea	-64.6768	-7.40467	-
Ny. darlingi	Ny_darlingi	AM42_128	MH844343	Brazil	Amazonas	Lábrea	-64.6631	-7.38205	-
Ny. deaneorum	Ny_deaneorum	AC423_6	MH844231	Brazil	Acre	Acrelândia	-67.1435	-9.70183	-
Ny. deaneorum	Ny_deaneorum	AC423_7	MH844232	Brazil	Acre	Acrelândia	-67.1435	-9.70183	-
Ny. deaneorum	Ny_deaneorum	AC423_8	MH844233	Brazil	Acre	Acrelândia	-67.1435	-9.70183	-
Ny. deaneorum	Ny_deaneorum	AC424_1	MH844234	Brazil	Acre	Acrelândia	-67.1435	-9.70183	-
Ny. deaneorum	Ny_deaneorum	AC427_10	MH844236	Brazil	Acre	Acrelândia	-67.1435	-9.70183	-
Ny. deaneorum	Ny_deaneorum	AC427_3	MH844237	Brazil	Acre	Acrelândia	-67.1435	-9.70183	-
Ny. deaneorum	Ny_deaneorum	AC427_8	MH844242	Brazil	Acre	Acrelândia	-67.1435	-9.70183	-
Ny. deaneorum	Ny_deaneorum	AC427_9	MH844243	Brazil	Acre	Acrelândia	-67.1435	-9.70183	-
Ny. deaneorum	Ny_deaneorum	AC434_1	MH844250	Brazil	Acre	Acrelândia	-67.1072	-9.77667	-
Ny. deaneorum	Ny_deaneorum	AC436_6	MH844252	Brazil	Acre	Acrelândia	-67.1115	-9.77631	-
Ny. deaneorum	Ny_deaneorum	AC60_1	MH844316	Brazil	Acre	Acrelândia	-66.8269	-9.99845	-
Ny. deaneorum	Ny_deaneorum	AC64_3	MH844320	Brazil	Acre	Acrelândia	-66.8269	-9.99845	-
Ny. dunhami	Ny_dunhami	AC150_1	MH844138	Brazil	Acre	Cruzeiro do Sul	-72.6897	-7.63144	-
Ny. dunhami	Ny_dunhami	AC152_1	MH844139	Brazil	Acre	Cruzeiro do Sul	-60.6897	-7.63144	-
Ny. dunhami	Ny_dunhami	AC152_2	MH844140	Brazil	Acre	Cruzeiro do Sul	-60.6897	-7.63144	-
Ny. dunhami	Ny_dunhami	AM32_7	MH844341	Brazil	Amazonas	Lábrea	-64.6631	-7.38205	-
Ny. dunhami	Ny_dunhami	AM81_12	MH844354	Brazil	Amazonas	Lábrea	-64.7346	-7.39956	-
Ny. dunhami	Ny_dunhami	AM81_8	MH844355	Brazil	Amazonas	Lábrea	-64.7346	-7.39956	-
Ny. dunhami	Ny_dunhami	AM81_9	MH844356	Brazil	Amazonas	Lábrea	-64.7346	-7.39956	-
Ny. goeldii	Ny_goeldii	AM73_104	MH844346	Brazil	Amazonas	Lábrea	-64.7409	-7.34761	-
Ny. goeldii	Ny_goeldii	AM73_105	MH844347	Brazil	Amazonas	Lábrea	-64.7409	-7.34761	-
Ny. goeldii	Ny_goeldii	AM73_107	MH844349	Brazil	Amazonas	Lábrea	-64.7409	-7.34761	-
Ny. goeldii	Ny_goeldii	AM73_112	MH844351	Brazil	Amazonas	Lábrea	-64.7409	-7.34761	-
Ny. goeldii	Ny_goeldii	AM74_29	MH844352	Brazil	Amazonas	Lábrea	-64.7409	-7.34761	-
Ny. goeldii	Ny_goeldii	RO189_5	MH844368	Brazil	Rondônia	Machadinho D'Oeste	-62.2552	-9.22324	-
Ny. konderi	Ny_konderi	AC106_31	MH844123	Brazil	Acre	Acrelândia	-66.7905	-10.0033	-
Ny. konderi	Ny_konderi	AC106_6	MH844124	Brazil	Acre	Acrelândia	-66.7905	-10.0033	-
Ny. konderi	Ny_konderi	AC106_7	MH844125	Brazil	Acre	Acrelândia	-66.7905	-10.0033	-
Ny. konderi	Ny_konderi	AC393_2	MH844215	Brazil	Acre	Acrelândia	-66.7894	-10.0026	-
Ny. konderi	Ny_konderi	AC430_7	MH844246	Brazil	Acre	Acrelândia	-66.8641	-9.95144	-
Ny. konderi	Ny_konderi	AC46_6	MH844274	Brazil	Acre	Acrelândia	-66.8169	-10.0114	-
Ny. konderi	Ny_konderi	AC48_3	MH844286	Brazil	Acre	Acrelândia	-66.8169	-10.0114	-
Ny. konderi	Ny_konderi	AC52_11	MH844298	Brazil	Acre	Acrelândia	-66.8169	-10.0114	-
Ny. konderi	Ny_nrkonderi	AC105_3	MH844120	Brazil	Acre	Acrelândia	-66.7905	-10.0033	-
Ny. konderi	Ny_nrkonderi	AC105_5	MH844121	Brazil	Acre	Acrelândia	-66.7905	-10.0033	-
Ny. konderi	Ny_nrkonderi	AC107_13	MH844126	Brazil	Acre	Acrelândia	-66.7905	-10.0033	-
Ny. konderi	Ny_nrkonderi	AC112_1	MH844132	Brazil	Acre	Acrelândia	-66.7905	-10.0033	-
Ny. konderi	Ny_nrkonderi	AC112_4	MH844133	Brazil	Acre	Acrelândia	-66.7905	-10.0033	-
Ny. konderi	Ny_nrkonderi	AC149_1	MH844136	Brazil	Acre	Cruzeiro do Sul	-72.6897	-7.63144	-
Ny. konderi	Ny_nrkonderi	AC149_10	MH844134	Brazil	Acre	Cruzeiro do Sul	-72.6897	-7.63144	-
Ny. konderi	Ny_nrkonderi	AC149_11	MH844135	Brazil	Acre	Cruzeiro do Sul	-72.6897	-7.63144	-
Ny. konderi	Ny_nrkonderi	AC149_2	MH844137	Brazil	Acre	Cruzeiro do Sul	-72.6897	-7.63144	-
Ny. konderi	Ny_nrkonderi	AC152_3	MH844141	Brazil	Acre	Cruzeiro do Sul	-72.6897	-7.63144	-
Ny. konderi	Ny_nrkonderi	AC204_2	MH844149	Brazil	Acre	Cruzeiro do Sul	-72.8169	-7.60089	-
Ny. konderi	Ny_nrkonderi	AC214_14	MH844155	Brazil	Acre	Cruzeiro do Sul	-60.82	-7.59583	-
Ny. konderi	Ny_nrkonderi	AC214_16	MH844157	Brazil	Acre	Cruzeiro do Sul	-60.82	-7.59583	-
Ny. konderi	Ny_nrkonderi	AC225_12	MH844163	Brazil	Acre	Cruzeiro do Sul	-72.82	-7.59583	-
Ny. konderi	Ny_nrkonderi	AC225_13	MH844164	Brazil	Acre	Cruzeiro do Sul	-72.82	-7.59583	-
Ny. konderi	Ny_nrkonderi	AC225_14	MH844165	Brazil	Acre	Cruzeiro do Sul	-72.82	-7.59583	-
Ny. konderi	Ny_nrkonderi	AC26_1	MH844174	Brazil	Acre	Acrelândia	-66.8171	-10.0106	-
Ny. konderi	Ny_nrkonderi	AC264_1	MH844175	Brazil	Acre	Mâncio Lima	-72.883	-7.618	-
Ny. konderi	Ny_nrkonderi	AC266_2	MH844176	Brazil	Acre	Mâncio Lima	-72.883	-7.618	-
Ny. konderi	Ny_nrkonderi	AC269_1	MH844179	Brazil	Acre	Mâncio Lima	-72.883	-7.618	-
Ny. konderi	Ny_nrkonderi	AC29_1	MH844117	Brazil	Acre	Acrelândia	-66.8403	-10	-
Ny. konderi	Ny_nrkonderi	AC30_13	MH844186	Brazil	Acre	Acrelândia	-66.8403	-10	-
Ny. konderi	Ny_nrkonderi	AC31_1	MH844189	Brazil	Acre	Acrelândia	-66.8403	-10	-
Ny. konderi	Ny_nrkonderi	AC314_7	MH844193	Brazil	Acre	Mâncio Lima	-72.87	-7.6232	-
Ny. konderi	Ny_nrkonderi	AC314_8	MH844194	Brazil	Acre	Mâncio Lima	-72.87	-7.6232	-
Ny. konderi	Ny_nrkonderi	AC314_9	MH844195	Brazil	Acre	Mâncio Lima	-72.87	-7.6232	-
Ny. konderi	Ny_nrkonderi	AC322_2	MH844198	Brazil	Acre	Mâncio Lima	-72.87	-7.6232	-
Ny. konderi	Ny_nrkonderi	AC352_1	MH844199	Brazil	Acre	Mâncio Lima	-72.9364	-7.49025	-
Ny. konderi	Ny_nrkonderi	AC365_7	MH844201	Brazil	Acre	Mâncio Lima	-72.9911	-7.4416	-
Ny. konderi	Ny_nrkonderi	AC366_3	MH844202	Brazil	Acre	Mâncio Lima	-72.9911	-7.4416	-
Ny. konderi	Ny_nrkonderi	AC389_1	MH844205	Brazil	Acre	Acrelândia	-66.7894	-10.0026	-
Ny. konderi	Ny_nrkonderi	AC389_2	MH844116	Brazil	Acre	Acrelândia	-66.7894	-10.0026	-
Ny. konderi	Ny_nrkonderi	AC389_7	MH844206	Brazil	Acre	Acrelândia	-66.7894	-10.0026	-
Ny. konderi	Ny_nrkonderi	AC389_8	MH844207	Brazil	Acre	Acrelândia	-66.7894	-10.0026	-
Ny. konderi	Ny_nrkonderi	AC390_1	MH844208	Brazil	Acre	Acrelândia	-66.7894	-10.0026	-
Ny. konderi	Ny_nrkonderi	AC390_5	MH844209	Brazil	Acre	Acrelândia	-66.7894	-10.0026	-
Ny. konderi	Ny_nrkonderi	AC390_7	MH844210	Brazil	Acre	Acrelândia	-66.7894	-10.0026	-
Ny. konderi	Ny_nrkonderi	AC391_1	MH844211	Brazil	Acre	Acrelândia	-66.7894	-10.0026	-
Ny. konderi	Ny_nrkonderi	AC391_2	MH844212	Brazil	Acre	Acrelândia	-66.7894	-10.0026	-
Ny. konderi	Ny_nrkonderi	AC392_1	MH844213	Brazil	Acre	Acrelândia	-66.7894	-10.0026	-
Ny. konderi	Ny_nrkonderi	AC392_2	MH844214	Brazil	Acre	Acrelândia	-66.7894	-10.0026	-
Ny. konderi	Ny_nrkonderi	AC394_1	MH844216	Brazil	Acre	Acrelândia	-66.7894	-10.0026	-
Ny. konderi	Ny_nrkonderi	AC395_1	MH844217	Brazil	Acre	Acrelândia	-66.8403	-10	-
Ny. konderi	Ny_nrkonderi	AC395_2	MH844218	Brazil	Acre	Acrelândia	-66.8403	-10	-
Ny. konderi	Ny_nrkonderi	AC395_3	MH844219	Brazil	Acre	Acrelândia	-66.8403	-10	-
Ny. konderi	Ny_nrkonderi	AC395_4	MH844220	Brazil	Acre	Acrelândia	-66.8403	-10	-
Ny. konderi	Ny_nrkonderi	AC395_5	MH844221	Brazil	Acre	Acrelândia	-66.8403	-10	-
Ny. konderi	Ny_nrkonderi	AC401_23	MH844223	Brazil	Acre	Acrelândia	-66.8403	-10	-
Ny. konderi	Ny_nrkonderi	AC401_24	MH844224	Brazil	Acre	Acrelândia	-66.8403	-10	-
Ny. konderi	Ny_nrkonderi	AC401_25	MH844225	Brazil	Acre	Acrelândia	-66.8403	-10	-
Ny. konderi	Ny_nrkonderi	AC401_26	MH844226	Brazil	Acre	Acrelândia	-66.8403	-10	-
Ny. konderi	Ny_nrkonderi	AC402_7	MH844227	Brazil	Acre	Acrelândia	-66.8403	-10	-
Ny. konderi	Ny_nrkonderi	AC402_8	MH844228	Brazil	Acre	Acrelândia	-66.8403	-10	-
Ny. konderi	Ny_nrkonderi	AC403_4	MH844229	Brazil	Acre	Acrelândia	-66.8403	-10	-
Ny. konderi	Ny_nrkonderi	AC405_1	MH844230	Brazil	Acre	Acrelândia	-66.8403	-10	-
Ny. konderi	Ny_nrkonderi	AC430_1	MH844245	Brazil	Acre	Acrelândia	-66.8403	-10	-
Ny. konderi	Ny_nrkonderi	AC430_8	MH844247	Brazil	Acre	Acrelândia	-66.8403	-10	-
Ny. konderi	Ny_nrkonderi	AC430_9	MH844248	Brazil	Acre	Acrelândia	-66.8403	-10	-
Ny. konderi	Ny_nrkonderi	AC44_1	MH844254	Brazil	Acre	Acrelândia	-66.8169	-10.0114	-
Ny. konderi	Ny_nrkonderi	AC44_33	MH844255	Brazil	Acre	Acrelândia	-66.8169	-10.0114	-
Ny. konderi	Ny_nrkonderi	AC447_1	MH844260	Brazil	Acre	Acrelândia	-66.8403	-10	-
Ny. konderi	Ny_nrkonderi	AC447_2	MH844261	Brazil	Acre	Acrelândia	-66.8403	-10	-
Ny. konderi	Ny_nrkonderi	AC45_29	MH844265	Brazil	Acre	Acrelândia	-66.8169	-10.0114	-
Ny. konderi	Ny_nrkonderi	AC45_37	MH844269	Brazil	Acre	Acrelândia	-66.8169	-10.0114	-
Ny. konderi	Ny_nrkonderi	AC450_1	MH844262	Brazil	Acre	Acrelândia	-66.8403	-10	-
Ny. konderi	Ny_nrkonderi	AC451_6	MH844263	Brazil	Acre	Acrelândia	-66.8403	-10	-
Ny. konderi	Ny_nrkonderi	AC451_7	MH844264	Brazil	Acre	Acrelândia	-66.8403	-10	-
Ny. konderi	Ny_nrkonderi	AC46_13	MH844271	Brazil	Acre	Acrelândia	-66.8169	-10.0114	-
Ny. konderi	Ny_nrkonderi	AC46_38	MH844272	Brazil	Acre	Acrelândia	-66.8169	-10.0114	-
Ny. konderi	Ny_nrkonderi	AC46_47	MH844273	Brazil	Acre	Acrelândia	-66.8169	-10.0114	-
Ny. konderi	Ny_nrkonderi	AC47_13	MH844275	Brazil	Acre	Acrelândia	-66.8169	-10.0114	-
Ny. konderi	Ny_nrkonderi	AC47_21	MH844281	Brazil	Acre	Acrelândia	-66.8169	-10.0114	-
Ny. konderi	Ny_nrkonderi	AC47_22	MH844282	Brazil	Acre	Acrelândia	-66.8169	-10.0114	-
Ny. konderi	Ny_nrkonderi	AC48_21	MH844283	Brazil	Acre	Acrelândia	-66.8169	-10.0114	-
Ny. konderi	Ny_nrkonderi	AC49_18	MH844287	Brazil	Acre	Acrelândia	-66.8169	-10.0114	-
Ny. konderi	Ny_nrkonderi	AC49_23	MH844288	Brazil	Acre	Acrelândia	-66.8169	-10.0114	-
Ny. konderi	Ny_nrkonderi	AC50_20	MH844293	Brazil	Acre	Acrelândia	-66.8169	-10.0114	-
Ny. konderi	Ny_nrkonderi	AC50_7	MH844295	Brazil	Acre	Acrelândia	-66.8169	-10.0114	-
Ny. konderi	Ny_nrkonderi	AC51_6	MH844296	Brazil	Acre	Acrelândia	-66.8169	-10.0114	-
Ny. konderi	Ny_nrkonderi	AC53_29	MH844299	Brazil	Acre	Acrelândia	-66.8169	-10.0114	-
Ny. konderi	Ny_nrkonderi	AC53_64	MH844311	Brazil	Acre	Acrelândia	-66.8169	-10.0114	-
Ny. konderi	Ny_nrkonderi	AC53_72	MH844312	Brazil	Acre	Acrelândia	-66.8169	-10.0114	-
Ny. konderi	Ny_nrkonderi	AC53_73	MH844313	Brazil	Acre	Acrelândia	-66.8169	-10.0114	-
Ny. konderi	Ny_nrkonderi	AM47_3	MH844344	Brazil	Amazonas	Lábrea	-66.8403	-10	-
Ny. nuneztovari	Ny_nuneztovari	AM73_106	MH844348	Brazil	Amazonas	Lábrea	-66.8403	-10	-
Ny. nuneztovari	Ny_nuneztovari	AM73_111	MH844350	Brazil	Amazonas	Lábrea	-66.8403	-10	-
Ny. nuneztovari	Ny_nuneztovari	AM74_30	MH844353	Brazil	Amazonas	Lábrea	-66.8403	-10	-
Ny. oryzalimnetes	Ny_oryzalimnetes	AC37_2	MH844204	Brazil	Acre	Acrelândia	-66.8403	-10	-
Ny. oryzalimnetes	Ny_oryzalimnetes	AC59_5	MH844315	Brazil	Acre	Acrelândia	-66.8403	-10	-
Ny. oryzalimnetes	Ny_oryzalimnetes	AC61_3	MH844319	Brazil	Acre	Acrelândia	-66.8403	-10	-
Ny. oryzalimnetes	Ny_oryzalimnetes	AC99_1	MH844325	Brazil	Acre	Acrelândia	-66.8401	-9.99657	-
Ny. oswaldoi	Ny_oswaldoiA	AC30_4	MH844187	Brazil	Acre	Acrelândia	-66.8403	-10	-
Ny. oswaldoi	Ny_oswaldoiA	AM155_1	MH844331	Brazil	Amazonas	Itacoatiara	-66.8403	-10	-
Ny. oswaldoi	Ny_oswaldoiA	AM26_1	MH844335	Brazil	Amazonas	Lábrea	-66.8403	-10	-
Ny. oswaldoi	Ny_oswaldoiA	AM32_3	MH844339	Brazil	Amazonas	Lábrea	-66.8403	-10	-
Ny. oswaldoi	Ny_oswaldoiA	AM32_6	MH844340	Brazil	Amazonas	Lábrea	-66.8403	-10	-
Ny. oswaldoi	Ny_oswaldoiA	AM33_4	MH844342	Brazil	Amazonas	Lábrea	-66.8403	-10	-
Ny. oswaldoi	Ny_oswaldoiA	AM49_1	MH844345	Brazil	Amazonas	Lábrea	-66.8403	-10	-
Ny. oswaldoi	Ny_oswaldoiA	RO156_1	MH844358	Brazil	Rondônia	Machadinho D'Oeste	-66.8403	-10	-
Ny. oswaldoi	Ny_oswaldoiA	RO157_2	MH844359	Brazil	Rondônia	Machadinho D'Oeste	-66.8403	-10	-
Ny. oswaldoi	Ny_oswaldoiA	RO166_2	MH844361	Brazil	Rondônia	Machadinho D'Oeste	-66.8403	-10	-
Ny. oswaldoi	Ny_oswaldoiA	RO182_15	MH844366	Brazil	Rondônia	Machadinho D'Oeste	-66.8403	-10	-
Ny. oswaldoi	Ny_oswaldoiA	RO223_37	MH844379	Brazil	Rondônia	Machadinho D'Oeste	-66.8403	-10	-
Ny. oswaldoi	Ny_oswaldoiss	AM173_1	MH844332	Brazil	Amazonas	Itacoatiara	-59.0751	-3.08947	-
Ny. rangeli	Ny_rangeli	RO18_8_2	JN413709	Brazil	Rondônia	Monte Negro	-63.2359	-10.301	-
Ny. rangeli	Ny_rangeli	AC18_110	JN413708	Brazil	Acre	Acrelândia	-67.1348	-96.8431	-
Ny. rangeli	Ny_rangeli	AC47_18	MH844279	Brazil	Acre	Acrelândia	-66.8169	-10.0114	-
Ny. rangeli	Ny_rangeli	AC59_1	MH844314	Brazil	Acre	Acrelândia	-66.8269	-9.99845	-
Ny. rangeli	Ny_rangeli	AC60_3	MH844317	Brazil	Acre	Acrelândia	-66.8269	-9.99845	-
Ny. rangeli	Ny_rangeli	AC61_1	MH844318	Brazil	Acre	Acrelândia	-66.8269	-9.99845	-
Ny. rangeli	Ny_rangeli	AC64_5	MH844321	Brazil	Acre	Acrelândia	-66.8269	-9.99845	-
Ny. rangeli	Ny_rangeli	AC66_3	MH844322	Brazil	Acre	Acrelândia	-66.8269	-9.99845	-
Ny. triannulatus	Ny_triannulatus	AC45_33	MH844266	Brazil	Acre	Acrelândia	-66.8169	-10.0114	-
Ny. triannulatus	Ny_triannulatus	AC45_34	MH844267	Brazil	Acre	Acrelândia	-66.8169	-10.0114	-
Ny. triannulatus	Ny_triannulatus	AC45_35	MH844268	Brazil	Acre	Acrelândia	-66.8169	-10.0114	-
Reference sequences:
Ny. strodei	Ny_albertoi	MG07_1_24	GU226678	Brazil	Minas Gerais	Frutal	-	-	-
Ny. strodei	Ny_albertoi	MG07_7_10	GU226677	Brazil	Minas Gerais	Frutal	-	-	-
Ny. albitarsis	Ny_albitarsis	MG11_2_03	JN413684	Brazil	Minas Gerais	Planura	-	-	-
Ny. albitarsis	Ny_albitarsis	SP104_2_2	JN413685	Brazil	São Paulo	Pindamonhangaba	-	-	-
Ny. albitarsis	Ny_albitarsis	VP06_01_01	JF923680	Brazil	São Paulo	Pindamonhangaba	-	-	-
Ny. arthuri	Ny_arthuriA	MG07_6_3	GU226681	Brazil	Minas Gerais	Frutal	-	-	-
Ny. arthuri	Ny_arthuriA	MG24-1	GU226682	Brazil	Minas Gerais	Goiana	-	-	-
Ny. arthuri	Ny_arthuriA	SP31-120	GU226687	Brazil	São Paulo	Inúbia Paulista	-	-	-
Ny. arthuri	Ny_arthuriC	RO8-104	GU226690	Brazil	Rondônia	Monte Negro	-	-	-
Ny. arthuri	Ny_arthuriC	RO8-1	GU226688	Brazil	Rondônia	Monte Negro	-	-	-
-	Ny_benarrochiB	LUP359	JX170904	Peru	-	-	-	-	-
-	Ny_benarrochiB	SPD17	JX170907	Peru	-	-	-	-	-
-	Ny_benarrochiB	SRA6	JX170909	Peru	-	-	-	-	-
Ny. benarrochi	Ny_benarrochiG1	AC15_109	JF923687	Brazil	Acre	Acrelandia	-	-	-
Ny. benarrochi	Ny_benarrochiG1	AC18_115	JF923688	Brazil	Acre	Acrelandia	-	-	-
Ny. benarrochi	Ny_benarrochiG1	AC18_117	JF923689	Brazil	Acre	Acrelandia	-	-	-
Ny. benarrochi	Ny_benarrochiG1	AC18_120	JF923726	Brazil	Acre	Acrelandia	-	-	-
Ny. braziliensis	Ny_braziliensis	SP16_03	JF923691	Brazil	São Paulo	Dourado	-	-	-
Ny. braziliensis	Ny_braziliensis	AP21_39_3	JF923690	Brazil	Amapá	Macapa	-	-	-
Ny. darlingi	Ny_darlingi	AC2021100	JF923693	Brazil	Acre	Acrelandia	-	-	-
Ny. darlingi	Ny_darlingi	AP130306	JF923694	Brazil	Amapa	Macapa	-	-	-
Ny. darlingi	Ny_darlingi	AP170110	JF923695	Brazil	Amapa	Abacate da Pedreira	-	-	-
Ny. deaneorum	Ny_deaneorum	AC0107	JF923696	Brazil	Acre	Acrelandia	-	-	-
Ny. deaneorum	Ny_deaneorum	AC0202	JF923697	Brazil	Acre	Acrelandia	-	-	-
Ny. deaneorum	Ny_deaneorum	MS08_127	JN413686	Brazil	Mato Grosso do Sul	Aquidauana	-	-	-
Ny. dunhami	Ny_dunhami	BRAM1306	JF923698	Brazil	Amazonas	Parintins	-	-	-
Ny. dunhami	Ny_dunhami	BRAM1307	JF923699	Brazil	Amazonas	Parintins	-	-	-
Ny. dunhami	Ny_dunhami	BRAM13113	JF923700	Brazil	Amazonas	Parintins	-	-	-
Ny. goeldii	Ny_goeldii	BRAM0301	JF923704	Brazil	Amazonas	Itacoatiara	-	-	-
Ny. goeldii	Ny_goeldii	BRAM22101	JF923705	Brazil	Para	Prainha	-	-	-
Ny. goeldii	Ny_goeldii	PA7_02_02	JF923706	Brazil	Para	Belterra	-	-	-
Ny. goeldii	Ny_goeldii	PA7_04_03	JF923708	Brazil	Para	Belterra	-	-	-
Ny. goeldii	Ny_goeldii	RO213	JF923711	Brazil	Rondônia	Monte Negro	-	-	-
-	Ny_goeldii	-	KU865530	Brazil			-	-	Hap2/Grp3
-	Ny_goeldii	-	KU865531	Brazil	-	-	-	-	Hap3/Grp3
-	Ny_goeldii	-	KU865548	Brazil	-	-	-	-	Hap20/Grp5
Ny. goeldii	Ny_goeldii	PA7_03_08	JF923707	Brazil	Para	Belterra	-	-	-
Ny. goeldii	Ny_goeldii	PA7_17_02	JF923709	Brazil	Para	Belterra	-	-	-
-	Ny_goeldii	-	KU865529	Brazil	-	-	-	-	Hap1/Grp1
-	Ny_goeldii	-	KU865532	Brazil	-	-	-	-	Hap4/Grp1
-	Ny_goeldii	-	KU865534	Brazil	-	-	-	-	Hap6/Grp1
-	Ny_goeldii	-	KU865536	Brazil	-	-	-	-	Hap8/Grp1
-	Ny_goeldii	-	KU865538	Brazil	-	-	-	-	Hap10/Grp1
-	Ny_goeldii	-	KU865540	Brazil	-	-	-	-	Hap12/Grp1
-	Ny_goeldii	-	KU865544	Brazil	-	-	-	-	Hap16/Grp4
-	Ny_goeldii	-	KU865545	Brazil	-	-	-	-	Hap17/Grp4
-	Ny_goeldii	-	KU865546	Brazil	-	-	-	-	Hap18/Grp4
-	Ny_goeldii	-	KU865549	Brazil	-	-	-	-	Hap21/Grp4
-	Ny_goeldii	-	KU865550	Brazil	-	-	-	-	Hap22/Grp4
-	Ny_goeldii	-	KU865551	Brazil	-	-	-	-	Hap23/Grp4
Ny. konderi	Ny_konderi	AP15_11	JF437966	Brazil	Amapá	Macapá	-	-	-
Ny. konderi	Ny_konderi	AP21_43	JF923716	Brazil	Amapá	Macapá	-	-	-
Ny. konderi	Ny_konderi	AP25_1_100	JF437967	Brazil	Amapá	Macapá	-	-	-
Ny. konderi	Ny_konderi	AP25_11_24	JF437968	Brazil	Amapá	Macapá	-	-	-
-	Ny_konderi	NHM9051	KF809030	Brazil	Amapá	Macapá	-	-	-
-	Ny_konderi	NHM09054	KF809031	Brazil	Amapá	Macapá	-	-	-
-	Ny_konderi	NHM09053	KF809032	Brazil	Amapá	Macapá	-	-	-
-	Ny_konderi	NHM09052	KF809033	Brazil	Amapá	Macapá	-	-	-
Ny. marajoara	Ny_marajoara	PA3_1_13	JN413703	Brazil	Para	Santarem	-	-	-
Ny. marajoara	Ny_marajoara	AP21_50_1	JN413702	Brazil	Amapá	Macapá	-	-	-
Ny. marajoara	Ny_marajoara	AP5_01_04	JF923719	Brazil	Amapá	Macapá	-	-	-
Ny. oswaldoi	Ny_nearoswaldoi	SP22_9	JN413704	Brazil	São Paulo	Pariquera-Açu	-	-	-
Ny. konderi	Ny_nrkonderi	AC1816	JF437965	Brazil	Acre	-	-	-	-
-	Ny_nrkonderi	CCDB-10764-D08	KF670997	Ecuador	-	-	-	-	-
-	Ny_nrkonderi	52054789	KF809137	Ecuador	-	-	-	-	-
-	Ny_nuneztovari	-	KU865556	Brazil	-	-	-	-	Hap28/Grp2
-	Ny_nuneztovari	-	KU865557	Brazil	-	-	-	-	Hap29/Grp2
Ny. nuneztovari	Ny_nuneztovari	RO1_107	JF923710	Brazil	Rondônia	Monte Negro	-	-	-
Ny. nuneztovari	Ny_nuneztovari	RO20_02_03	JF923713	Brazil	Rondônia	Monte Negro	-	-	-
Ny. nuneztovari	Ny_nuneztovari	RO4_02	JF923712	Brazil	Rondônia	Monte Negro	-	-	-
Ny. oryzalimnetes	Ny_oryzalimnetes	SP09_03	JF923720	Brazil	São Paulo	Dourado	-	-	-
Ny. oswaldoi	Ny_oswaldoiA	AC18_102	JF923722	Brazil	Acre	Acrelândia	-	-	-
Ny. oswaldoi	Ny_oswaldoiA	AC18_107	JF923723	Brazil	Acre	Acrelândia	-	-	-
Ny. oswaldoi	Ny_oswaldoiA	PA_15_C1F2	JN413705	Brazil	Para	Bom Jesus de Tocantins	-	-	-
Ny. oswaldoi	Ny_oswaldoiA	PA_15_C2F4	JN413706	Brazil	Para	Marabá	-	-	-
Ny. oswaldoi	Ny_oswaldoiA	PA_15_C2F7	JN413707	Brazil	Para	Bom Jesus de Tocantins	-	-	-
-	Ny_oswaldoiA	51911931	KF809034	Brazil	Amazonas	Tefé	-	-	-
-	Ny_oswaldoiA	51918966	KF809050	Brazil	Mato Grosso	Peixoto de Azevedo	-	-	-
-	Ny_oswaldoiB	WRBU_DNA_107	KC555056	Venezuela	-	-	-	-	-
-	Ny_oswaldoiB	WRBU_DNA_104	KC555073	Venezuela	-	-	-	-	-
Ny. oswaldoi	Ny_oswaldoiss	PR06_2_13	JF437969	Brazil	Paraná	Porto Natal	-	-	-
Ny. oswaldoi	Ny_oswaldoiss	PR14_1_9	JF437970	Brazil	Paraná	Porto Rico	-	-	-
Ny. oswaldoi	Ny_oswaldoiss	PR14_3_17	JF437971	Brazil	Paraná	Porto Rico	-	-	-
Ny. oswaldoi	Ny_oswaldoiss	PR14_9_108	JF437972	Brazil	Paraná	Porto Rico	-	-	-
Ny. oswaldoi	Ny_oswaldoiss	RO18_1_6	JF437974	Brazil	Rondônia	Monte Negro	-	-	-
Ny. oswaldoi	Ny_oswaldoiss	ES081107	JF923721	Brazil	Espírito Santo	Jaguaré	-	-	-
Ny. oswaldoi	Ny_oswaldoiss	SP0306	JF923724	Brazil	São Paulo	Pariquera-Açu	-	-	-
-	Ny_oswaldoiss	51917691	KF809128	Brazil	-	-	-	-	-
-	Ny_oswaldoiss	51912042	KF809126	Brazil	-	-	-	-	-
-	Ny_oswaldoiss	PR19_9_1	JF437973	Brazil	Paraná	Santa Helena	-	-	-
Ny. rangeli	Ny_rangeli	AC15_04	JF923725	Brazil	Acre	Acrelândia	-	-	-
Ny. strodei	Ny_strodei	ES091	GU226664	Brazil	Espírito Santo	Santa Teresa	-	-	-
Ny. strodei	Ny_strodei	MG30_102	GU226670	Brazil	Minas Gerais	Frutal	-	-	-
Ny. strodei	Ny_strodei	SPR04_07	JF923730	Brazil	Paraná	Sao Jose dos Pinhais	-	-	-
Ny. strodei	Ny_strodei	VP06_05_01	JF923731	Brazil	São Paulo	Pindamonhangaba	-	-	-
Ny. triannulatus	Ny_triannulatus	AC1_108	JF923732	Brazil	Acre	Acrelândia	-	-	-
Ny. triannulatus	Ny_triannulatus	AP17_04_01	JF923733	Brazil	Amapá	Abacate da Pedreira	-	-	-
Ny. triannulatus	Ny_triannulatus	ES03_03_01	JF923734	Brazil	Espírito Santo	Sooretama	-	-	-
-	Ny_triannulatus	PNA157	KR909640	Colombia	-	-	-	-	-
-	Ny_triannulatus	SPU694	KR909651	Colombia	-	-	-	-	-
-	Ny_triannulatus	SPU702	KR909652	Colombia	-	-	-	-	-
-	Ny_triannulatus	SPU708	KR909653	Colombia	-	-	-	-	-
-	Ny_triannulatus	SPU712	KR909654	Colombia	-	-	-	-	-
-	Ny_triannulatus	TAR1	KR909655	Colombia	-	-	-	-	-
-	Ny_triannulatus	TAR33	KR909656	Colombia	-	-	-	-	-
-	Ny_triannulatus	TAR58	KR909657	Colombia	-	-	-	-	-
-	Ny_triannulatus	TAR243	KR909658	Colombia	-	-	-	-	-
-	Ny_triannulatus	TAR303	KR909659	Colombia	-	-	-	-	-
-	Ny_triannulatus	TAR326	KR909660	Colombia	-	-	-	-	-
-	Ny_triannulatus	TAR332	KR909661	Colombia	-	-	-	-	-
-	Ny_triannulatus	TAR335	KR909662	Colombia	-	-	-	-	-
-	Ny_triannulatus	TAR336	KR909663	Colombia	-	-	-	-	-
-	Ny_triannulatus	TAR337	KR909664	Colombia	-	-	-	-	-
-	Ny_triannulatus	TAR338	KR909665	Colombia	-	-	-	-	-
Ny. triannulatus	Ny_triannulatus	MG56_12_03	JF923735	Brazil	Minas Gerais	Oliveira	-	-	-
Ny. triannulatus	Ny_triannulatus	SP0902	JF923736	Brazil	São Paulo	Dourado	-	-	-
-	An_costaiG1	PN13	KF698865	Colombia	-	-	-	-	-
-	An_costaiG1	PU161-68	JX205128	Colombia	-	-	-	-	-
-	An_costaiG4	52055070	-	-	-	-	-	-	from J.E. Conn
An. costai	An_costaiG4	MG35-05	HM022403	Colombia	-	-	-	-	-
-	An_costaiG4	MPC03-2	HM022404	Colombia	-	-	-	-	-
-	An_costaiG4	PU145-11	JX205127	Colombia	-	-	-	-	-
A. costai	An_costaiss	BRSP57_1	MF381614	Brazil	-	-	-	-	-
A. costai	An_costaiss	BA21_1_2	MF381604	Brazil	-	-	-	-	-
A. costai	An_costaiss	BA58_100	MF381607	Brazil	-	-	-	-	-
A. costai	An_costaiss	Icapara1	MF381631	Brazil	-	-	-	-	-
A. costai	An_costaiss	SP02_17_3	NC_037821	Brazil	São Paulo	Pariquera-Açu	-	-	-
An. fluminensis	An_fluminensis	RJ041	MF381677	Brazil	Rio de Janeiro	-	-	-	-
An. fluminensis	An_fluminensis	SP0211	MF381699	Brazil	São Paulo	-	-	-	-
-	An_fluminensis	CCDB-10764-B0	KF670996	Ecuador	-	-	-	-	-
-	An_fluminensis	CCDB-10764-B02	KF670995	Ecuador	-	-	-	-	-
-	An_fluminensis	51917456	KF670994	Ecuador	-	-	-	-	-
-	An_fluminensis	CCDB-10764-D10	KF670993	Ecuador	-	-	-	-	-
-	An_fluminensis	CCDB-10764-B07	KF670992	Ecuador	-	-	-	-	-
An. intermedius	An_intermedius	SP22_106	JF923714	Brazil	São Paulo	Pariquera-Açu	-	-	-
-	An_malefactor	MAL-12	HQ622625	Panama	-	-	-	-	-
-	An_malefactor	TIB14	KF698838	Colombia	-	-	-	-	-
-	An_malefactor	PL3230	KF698839	Colombia	-	-	-	-	-
-	An_malefactor	L472-C3-2-VF3	KF698840	Colombia	-	-	-	-	-
-	An_malefactor	L480-C2-15-VF3	KF698841	Colombia	-	-	-	-	-
-	An_malefactor	L471-C2-6-VF3	KF698842	Colombia	-	-	-	-	-
An. peryassui	An_peryassuiG2	MG29-24	HM022405	Colombia	-	-	-	-	-
-	An_peryassuiG2	L111	KF698875	Colombia	-	-	-	-	-
-	An_peryassuiG2	L16	KF698876	Colombia	-	-	-	-	-
-	An_peryassuiG2	L17	KF698877	Colombia	-	-	-	-	-
-	An_peryassuiG2	PA12_7_6	MF381661	Brazil	Pará	Belterra	-	-	-
-	An_peryassuiG3	AP21_28_2	MF381597	Brazil	Amapá	Macapá	-	-	-
-	An_punctimacula	YAV648	-	Panama	-	-	-	-	Lineage A/ss [36]
-	An_punctimacula	WB324	-	Panama	-	-	-	-	Lineage B [36]
-	An_punctimaculaG2	PU49-14	JX205122	Colombia	-	-	-	-	-
-	An_punctimaculass	BIR1162	-	Panama	-	-	-	-	Lineage A/ss [36]
